# Supplementary material for: Suppression of hydrogen evolution at catalytic surfaces in aqueous lithium ion batteries
Source: Royal Society of Chemistry journal article supplement (doi:10.1039/d0ta05568a), 2020-01-01
Supplement: d0ta05568a1.pdf [file d0ta05568a1.pdf]

## Supporting Information

# Suppressing Hydrogen Evolution at Catalytic Surfaces in the Aqueous Lithium Ion Batteries

*Fei Wang,<sup>\*1+</sup> Chuan-Fu Lin,<sup>2,3+</sup> Xiao Ji,<sup>4+</sup> Gary W. Rubloff,<sup>2</sup> and Chunsheng Wang<sup>\*4,5</sup>*

1. Department of Materials Science, Fudan University, Shanghai, 200433, China
2. Department of Materials Science and Engineering, University of Maryland, College Park, MD 20742, USA
3. Department of Mechanical Engineering, The Catholic University of America, Washington, DC 20064, USA
4. Department of Chemical and Biomolecular Engineering, University of Maryland, College Park, MD 20742, USA
5. Department of Chemistry and Biochemistry, University of Maryland, College Park, MD 20742, USA

### Corresponding Author

Fei Wang, E-mail: [feiw@fudan.edu.cn](mailto:feiw@fudan.edu.cn)

Chunsheng Wang, E-mail: [cswang@umd.edu](mailto:cswang@umd.edu)

## Experimental Section

### Materials

Lithium bis(trifluoromethane sulfonyl) imide ( $\text{LiN}(\text{SO}_2\text{CF}_3)_2$ , LiTFSI) (>98%) was purchased from Tokyo Chemical Industry. Water (HPLC grade) was purchased Sigma-Aldrich. The water-in-salt aqueous electrolyte is prepared by dissolving LiTFSI in water according to molality (21 mol salt in 1 kg water). The  $\text{Li}_4\text{Ti}_5\text{O}_{12}$  and  $\text{LiMn}_2\text{O}_4$  materials were purchased from MTI Corporation.

### Materials Characterizations

The morphology of the sample was investigated by transmission electron microscopy (TEM, JEM 2100 FEG, 200 keV). Raman measurements were performed on a Horiba Jobin Yvon Labram Aramis using a 532 nm diode-pumped solid-state laser, attenuated to give 900 mW power at the sample surface. X-ray photoelectron spectroscopy (XPS) was conducted on a high sensitivity Kratos AXIS 165 X-ray photoelectron spectrometer with Mg  $K\alpha$  radiation.

### Electrochemical Measurements

The  $\text{Li}_4\text{Ti}_5\text{O}_{12}$  anode electrodes were prepared by mixing 80% active material, 10% carbon black, and 10% polyvinylidene fluoride (PVDF) in *N*-methylpyrrolidinone (NMP) and the slurry mixture was then coated on Al foil. After coating, the electrodes were dried at 80 °C for 10 min to remove the solvent before pressing. The electrodes were cut into 1 cm<sup>2</sup> sheets, vacuum-dried at 100°C for 24 h, and weighed before assembly. The  $\text{LiMn}_2\text{O}_4$  electrodes were fabricated by compressing active materials, carbon black, and polytetrafluoroethylene (PTFE) at weight ratio of 8:1:1 onto the stainless steel mesh. The three-electrode devices use activated carbon as counter and Ag/AgCl as reference electrodes, respectively. Cyclic voltammetry (CV) and linear sweep voltammetry (LSV) was carried out using CHI 600E electrochemical work station. The potentials vs. Ag/AgCl were converted to those vs. standard  $\text{Li}^+/\text{Li}$ , supposing that the potential of Ag/AgCl electrode was 3.239 V vs  $\text{Li}^+/\text{Li}$ . The full ALIB cell was assembled in CR2032-type coin cell using  $\text{LiMn}_2\text{O}_4$  cathode,  $\text{Li}_4\text{Ti}_5\text{O}_{12}$  anode and glass fiber as separator. To minimize side reactions between the electrolyte and the coin cell components, the Al-Clad coin cell case was used at for the  $\text{Li}_4\text{Ti}_5\text{O}_{12}$  anode. The charge-discharge experiments were performed on a Land BT2000 battery test system (Wuhan, China) at room-temperature.

### ALD Coating of the LTO Electrodes

ALD- $\text{Al}_2\text{O}_3$ : The ALD  $\text{Al}_2\text{O}_3$  process was developed in BENEQ TFS 500 reactor with a 2 mbar base pressure. Precursors used for the ALD process were trimethyl-aluminum (TMA, Aldrich,

97%) and deionized water (H<sub>2</sub>O), and the reactor temperature was 150 °C. The ALD process used a 0.1 s/5 s/0.1 s/5 s TMA pulse/N<sub>2</sub>purge/ H<sub>2</sub>O pulse/N<sub>2</sub>purge sequence with a growth rate of 1.2 Å/cycle.

ALD-ZnO: The ALD ZnO process was developed in BENEQ TFS 500 reactor with a 2 mbr base pressure. Pure nitrogen was used as carrier gas and preheated to 150 °C for the whole process. Each cycle included alternating flows of diethyl zinc (DEZ, 1.5 s Zn precursor) and water (1.5 s, oxidant) separated by flows of pure nitrogen gas (4 and 10 s, respectively) with the growth rate of 2.0 Å/cycle.

ALD-TiO<sub>2</sub>: The ALD Al<sub>2</sub>O<sub>3</sub> process was developed in BENEQ TFS 500 reactor with a 2 mbr base pressure. Precursors used for the ALD process were tetrakis(dimethylamino)titanium (TDMAT, Aldrich, 99%) and deionized water (H<sub>2</sub>O), and the reactor temperature was 150 °C. The ALD process used a 0.5 s/10 s/0.1 s/10 s TDMAT pulse/N<sub>2</sub>purge/ H<sub>2</sub>O pulse/N<sub>2</sub>purge sequence with a growth rate of 0.5 Å/cycle.

Thickness of the deposited layer was determined by ellipsometric measurements of a blank Si wafer from the same ALD batch using a Cauchy optical model.

### **Simulations of $\Delta G_H$**

The  $\Delta G_H$  is defined as  $\Delta G_H = \Delta E_H + \Delta E_{ZPE} - T\Delta S_H$ , where  $\Delta E_{ZPE}$  and  $T\Delta S_H$  are the zero point energy and entropic corrections, respectively. In this work, the value of  $\Delta E_{ZPE} - T\Delta S_H$  is set to be 0.24 eV based on previous report.<sup>36</sup> And  $\Delta E_H$  is the hydrogen absorption energy, which is defined as:  $\Delta E_H = E_{nH} - E_{(n-1)H} - 1/2E_{H_2}$ , where  $E_{nH}$  and  $E_{(n-1)H}$ , are the total energy of the subtract with  $n$  and  $n-1$  hydrogen atoms, respectively. And  $E_{H_2}$  is the total energy of of H<sub>2</sub> gas molecule. All of the density functional theory (DFT) calculations<sup>37, 38</sup> are performed using Vienna Ab Initio Simulation Package (VASP)<sup>39</sup> with projector augmented wave (PAW) method.<sup>40</sup> The exchange-correlation energy is described by the functional of Perdew, Burke, and Ernzerhof (PBE) version of the generalized gradient approximation (GGA).<sup>41</sup> And the energy cut-off for the plane wave basis is 520 eV. A vacuum layer of 12 Å is used for all calculated models. Visualization of the structures are made by VESTA.<sup>42</sup>

### **Reference**

36. J. K. Nørskov, T. Bligaard, A. Logadottir, J. R. Kitchin, J. G. Chen, S. Pandelov and U. Stimming, *Journal of The Electrochemical Society*, 2005, **152**, J23.
37. P. Hohenberg and W. Kohn, *Physical review*, 1964, **136**, B864.
38. W. Kohn and L. J. Sham, *Physical review*, 1965, **140**, A1133.
39. G. Kresse and J. Hafner, *Physical Review B*, 1994, **49**, 14251-14269.
40. P. E. Blöchl, *Physical review B*, 1994, **50**, 17953.
41. J. P. Perdew, K. Burke and M. Ernzerhof, *Physical review letters*, 1996, **77**, 3865.
42. K. Momma and F. Izumi, *Journal of Applied Crystallography*, 2011, **44**, 1272-1276.

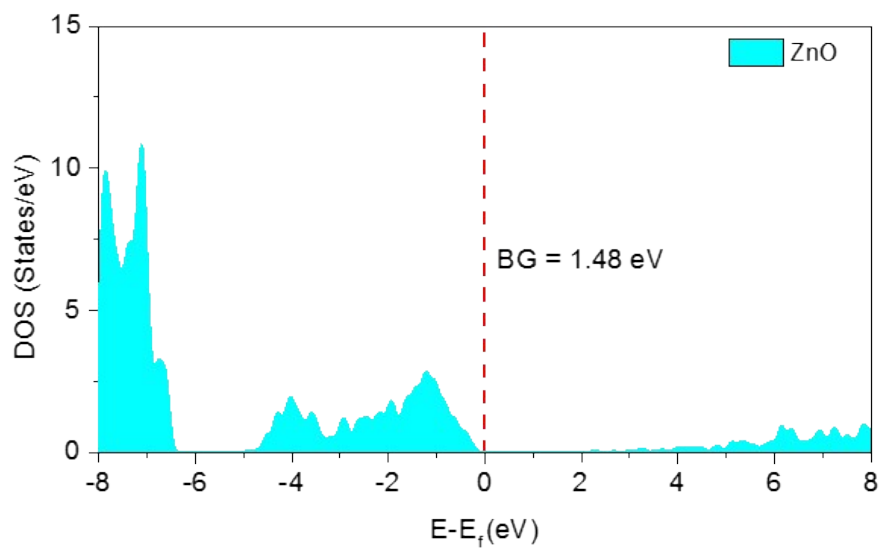

**Figure S1.** The density of state for ZnO. The red dash lines indicate the Fermi energies, and the band gaps (BG) are listed.

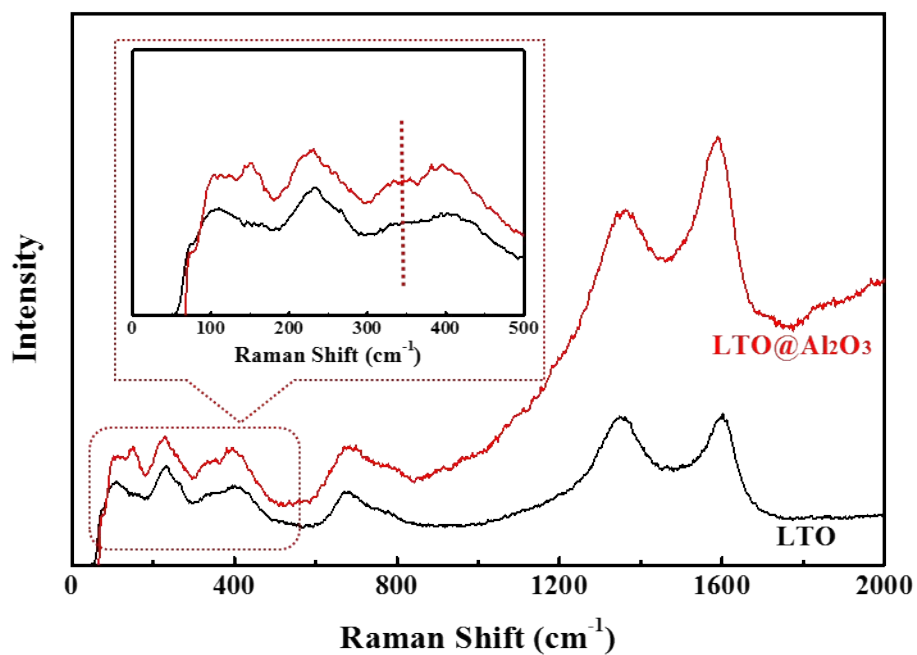

**Figure S2.** The Raman spectra comparison of the  $\text{Al}_2\text{O}_3$  coated LTO electrode and pristine LTO electrode.

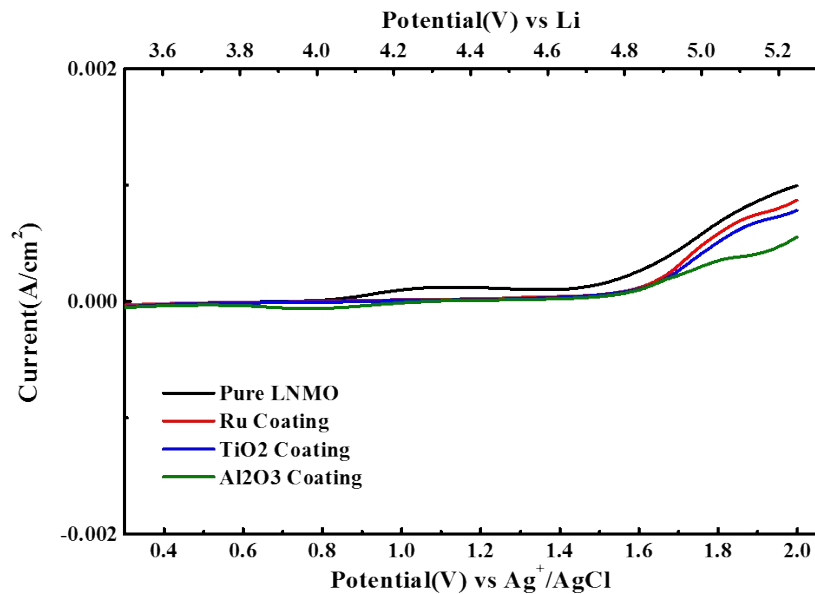

**Figure S3.** Anodic limits evaluated by linear sweep on different surface coated  $\text{LiNi}_{0.5}\text{Mn}_{1.5}\text{O}_4$  electrodes (inset the enlarged view). Counter electrode: activated carbon; Reference electrode:  $\text{Ag}/\text{AgCl}$ ; Scan rate: 1 mV/s.

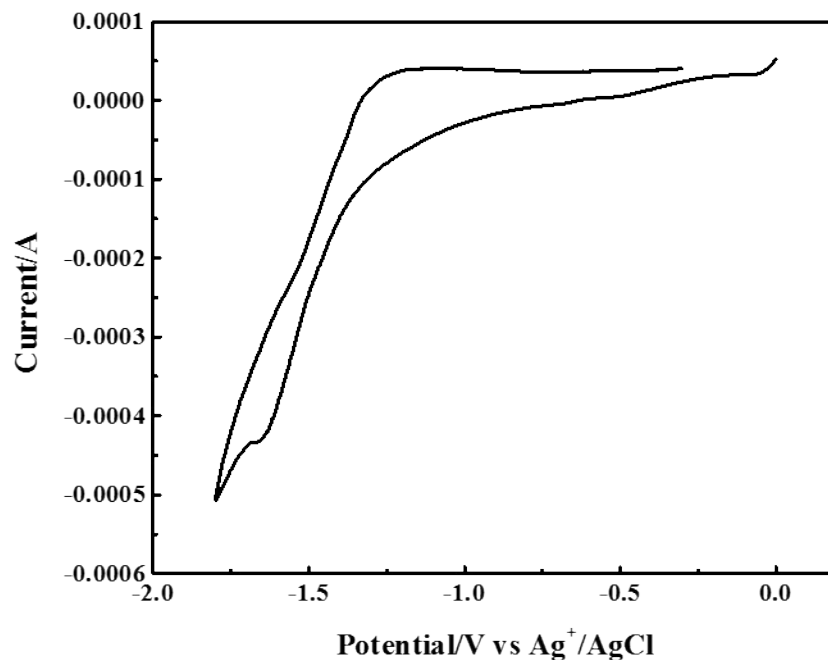

**Figure S4.** The CV scan of uncoated  $\text{Li}_4\text{Ti}_5\text{O}_{12}$  anodes in water-in-salt electrolytes at the scanning rate of 5 mV/S using a activated carbon counter electrode and an  $\text{Ag}/\text{AgCl}$  reference.

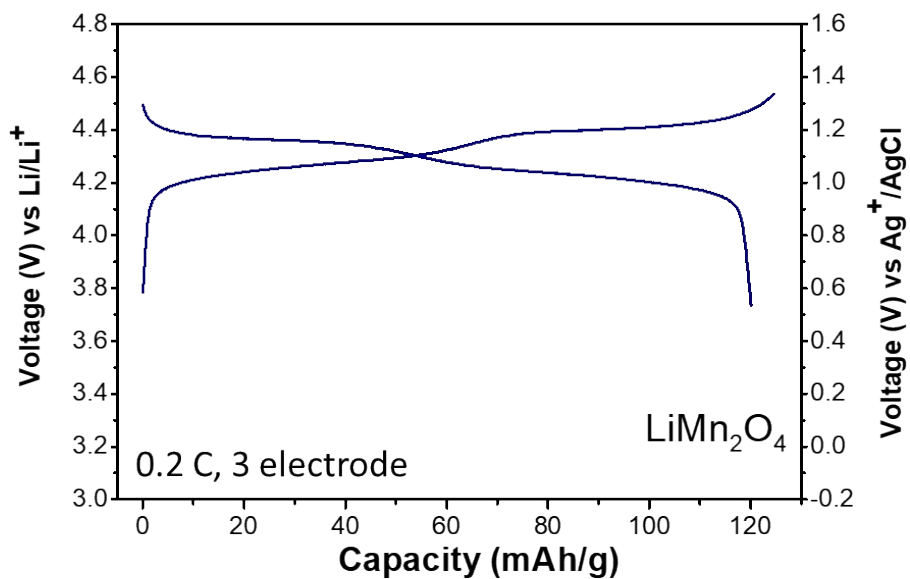

**Figure S5.** The typical voltage profile of  $\text{LiMn}_2\text{O}_4$  in 21m LiTFSI electrolyte at 0.2 C measured in a three-electrode cell using Pt as counter and Ag/AgCl as reference electrodes

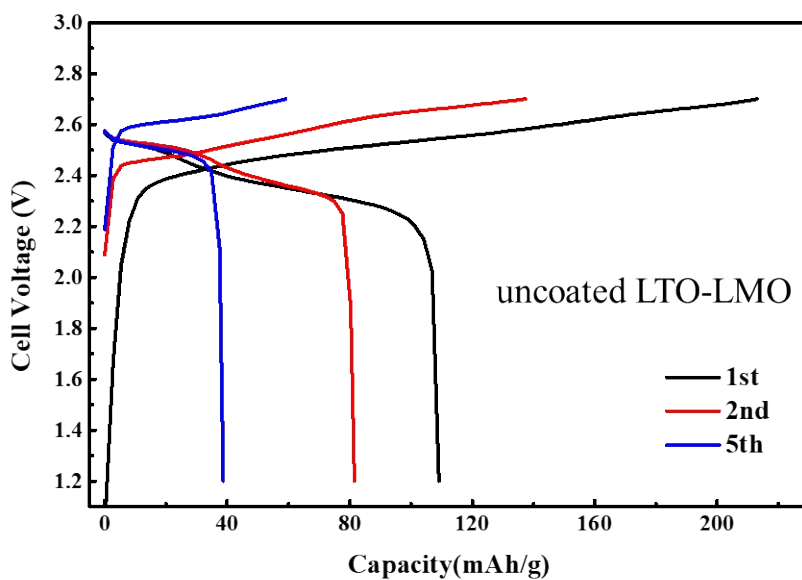

**Figure S6.** The voltage profile of the full cell using uncoated LTO anode and LMO cathode at 1 C current.

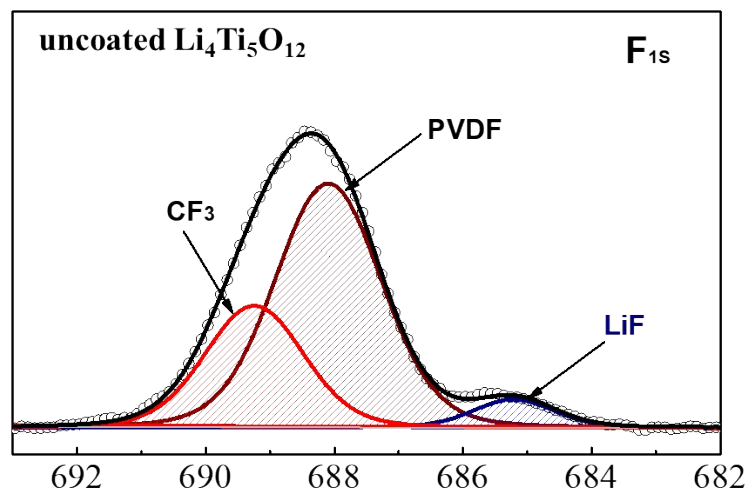

Figure S7. The  $F_{1s}$  XPS of the uncoated LTO electrode after cycling.

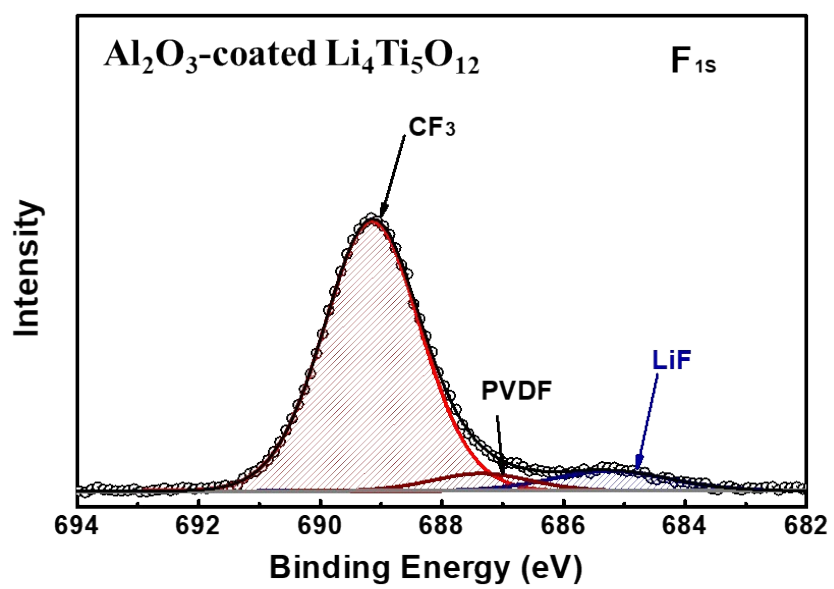

Figure S8. The  $F_{1s}$  XPS of the cycled LTO electrode.
